# Supplementary material
Source: PubMed Central journal article supplement (PMC5409855)

Figure S1

**A**

Day 21  
Post-transplantation

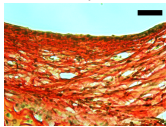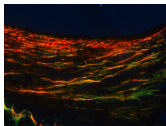

**B**

Day 35  
Saline

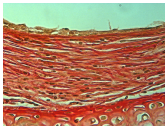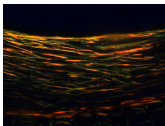

**C**

Day 35  
Relaxin+BAPN

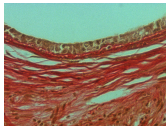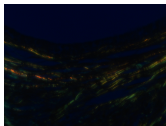

Supplement: NIHMS827864-supplement-Supp_Fig_S1.pdf [file NIHMS827864-supplement-Supp_Fig_S1.pdf]

Figure S2

**A**

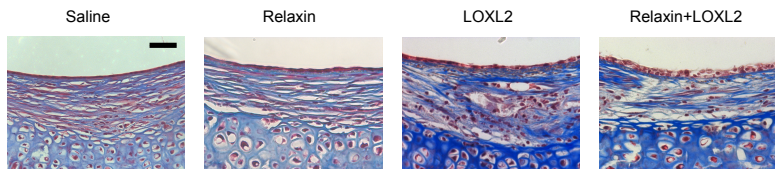

**B**

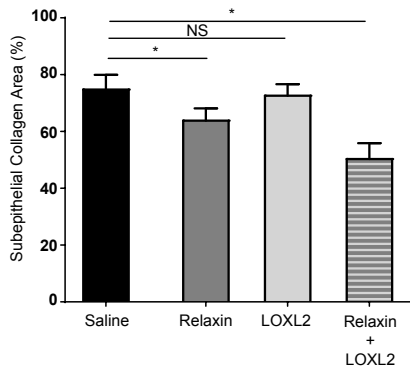

**C**

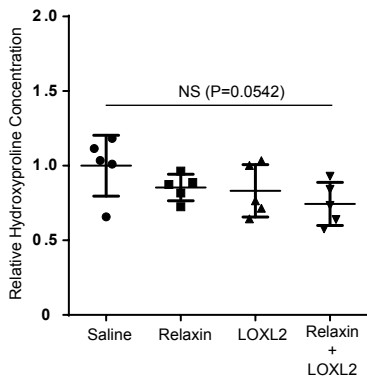

Supplement: NIHMS827864-supplement-Supp_Fig_S2.pdf [file NIHMS827864-supplement-Supp_Fig_S2.pdf]

Figure S3

Normal Lung Fibroblasts

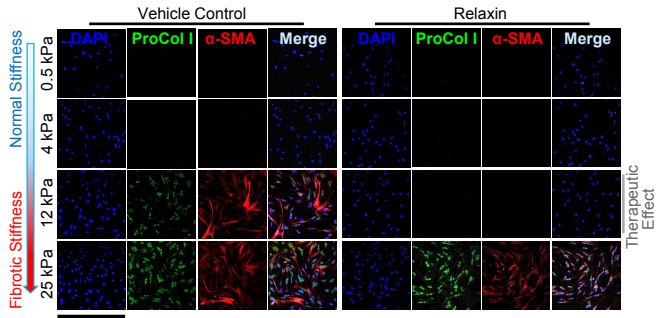

Supplement: NIHMS827864-supplement-Supp_Fig_S3.pdf [file NIHMS827864-supplement-Supp_Fig_S3.pdf]
